# Supplementary material for: Estimation of Glomerular Filtration Rate Based on Serum Cystatin C versus Creatinine in a Uruguayan Population
Source: PubMed Central journal article supplement (PMC4158300; doi:10.1155/2014/837106), 2014-08-24
Supplement: 837106.f1.pdf [file 837106.f1.pdf]

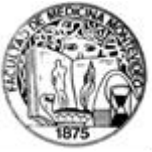

## Supplementary Material

This appendix formed part of the original submission and has been peer reviewed.  
We posted it as supplied by the authors.

Supplement to: Lujambio I, *et al*  
Estimation of glomerular filtration rate based on serum cystatin C versus creatinine in a  
Uruguayan population.  
*International Journal of Nephrology* 2014.

**Table S1.** Estimated glomerular filtration rate derived from serum cystatin C and/or creatinine

| Estimated glomerular filtration rate | Cystatin C (mg/L) | Creatinine (mg/dL) | Equation                                                                                                                          |
|--------------------------------------|-------------------|--------------------|-----------------------------------------------------------------------------------------------------------------------------------|
| <b>eGFR<sub>cys</sub></b>            |                   |                    |                                                                                                                                   |
| Women                                | ≤0.8              |                    | $133 \times (\text{Scys} / 0.8)^{-0.499} \times 0.996^{\text{Age}} \times 0.932$                                                  |
|                                      | >0.8              |                    | $133 \times (\text{Scys} / 0.8)^{-1.328} \times 0.996^{\text{Age}} \times 0.932$                                                  |
| Men                                  | ≤0.8              |                    | $133 \times (\text{Scys} / 0.8)^{-0.499} \times 0.996^{\text{Age}}$                                                               |
|                                      | >0.8              |                    | $133 \times (\text{Scys} / 0.8)^{-1.328} \times 0.996^{\text{Age}}$                                                               |
| <b>eGFR<sub>mdrd</sub></b>           |                   |                    |                                                                                                                                   |
| Women                                |                   |                    | $175 \times (\text{Scr})^{-1.154} \times \text{Age}^{-0.203} \times 0.742 [\times 1.212 \text{ if black}]$                        |
| Men                                  |                   |                    | $175 \times (\text{Scr})^{-1.154} \times \text{Age}^{-0.203} [\times 1.212 \text{ if black}]$                                     |
| <b>eGFR<sub>epi</sub></b>            |                   |                    |                                                                                                                                   |
| Women                                |                   | ≤0.7               | $144 \times (\text{Scr}/0.7)^{-0.329} \times 0.993^{\text{Age}} [\times 1.159 \text{ if black}]$                                  |
|                                      |                   | >0.7               | $144 \times (\text{Scr}/0.7)^{-1.209} \times 0.993^{\text{Age}} [\times 1.159 \text{ if black}]$                                  |
| Men                                  |                   | ≤0.9               | $141 \times (\text{Scr}/0.9)^{-0.411} \times 0.993^{\text{Age}} [\times 1.159 \text{ if black}]$                                  |
|                                      |                   | >0.9               | $141 \times (\text{Scr}/0.9)^{-1.209} \times 0.993^{\text{Age}} [\times 1.159 \text{ if black}]$                                  |
| <b>eGFR<sub>mix</sub></b>            |                   |                    |                                                                                                                                   |
| Women                                | ≤0.8              | ≤0.7               | $130 \times (\text{Scr}/0.7)^{-0.248} \times (\text{Scys}/0.8)^{-0.375} \times 0.995^{\text{Age}} [\times 1.08 \text{ if black}]$ |
|                                      |                   | >0.7               | $130 \times (\text{Scr}/0.7)^{-0.601} \times (\text{Scys}/0.8)^{-0.375} \times 0.995^{\text{Age}} [\times 1.08 \text{ if black}]$ |
|                                      | >0.8              | ≤0.7               | $130 \times (\text{Scr}/0.7)^{-0.248} \times (\text{Scys}/0.8)^{-0.711} \times 0.995^{\text{Age}} [\times 1.08 \text{ if black}]$ |
|                                      |                   | >0.7               | $130 \times (\text{Scr}/0.7)^{-0.611} \times (\text{Scys}/0.8)^{-0.711} \times 0.995^{\text{Age}} [\times 1.08 \text{ if black}]$ |
| Men                                  | ≤0.8              | ≤0.9               | $135 \times (\text{Scr}/0.9)^{-0.207} \times (\text{Scys}/0.8)^{-0.375} \times 0.995^{\text{Age}} [\times 1.08 \text{ if black}]$ |
|                                      |                   | >0.9               | $135 \times (\text{Scr}/0.9)^{-0.601} \times (\text{Scys}/0.8)^{-0.375} \times 0.995^{\text{Age}} [\times 1.08 \text{ if black}]$ |
|                                      | >0.8              | ≤0.9               | $135 \times (\text{Scr}/0.9)^{-0.207} \times (\text{Scys}/0.8)^{-0.711} \times 0.995^{\text{Age}} [\times 1.08 \text{ if black}]$ |
|                                      |                   | >0.9               | $135 \times (\text{Scr}/0.9)^{-0.601} \times (\text{Scys}/0.8)^{-0.711} \times 0.995^{\text{Age}} [\times 1.08 \text{ if black}]$ |

Abbreviations: eGFR<sub>cys</sub>, eGFR<sub>mdrd</sub>, eGFR<sub>epi</sub>, eGFR<sub>mix</sub> indicate estimated glomerular filtration rate derived from serum cystatin C, from serum creatinine according to the Modification of Diet in Renal Disease or the Chronic Kidney Disease Epidemiology Collaboration equations, or from both serum cystatin C and creatinine. Scys and Scr indicate serum cystatin C and serum creatinine, respectively.

**Table S2.** Differences between various estimates of GFR with eGFR derived from serum cystatin C as referent method

| Group            | N   | Difference in estimates of glomerular filtration rate<br>(mL/min/1.73m <sup>2</sup> ) |                     |                     |
|------------------|-----|---------------------------------------------------------------------------------------|---------------------|---------------------|
|                  |     | eGFR <sub>mdrd</sub>                                                                  | eGFR <sub>epi</sub> | eGFR <sub>mix</sub> |
| All participants | 119 | 9.7 (-38.4–57.8)§                                                                     | 11.5 (-25.5–48.5)§  | 5.6 (-10.2–21.4)§   |
| Women            | 68  | 11.3 (-43.1–65.7)‡                                                                    | 13.7 (-27.1–54.5)§  | 6.4 (-11.2–24.0)§   |
| Men              | 51  | 7.5 (-30.9–45.9)§                                                                     | 8.7 (-22.1–39.5)‡   | 4.5 (-8.7–17.7)§    |
| <60 years        | 57  | 3.2 (-51.4–57.8)                                                                      | 9.6 (-33.2–52.4)†   | 4.5 (-13.5–22.5)‡   |
| ≥60 years        | 62  | 15.6 (-22.4–53.6)§                                                                    | 13.3 (-17.5–44.1)§  | 6.6 (-6.8–20.0)§    |
| Normotension     | 66  | 8.1 (-50.3–66.5)*                                                                     | 10.4 (-34.0–54.8)‡  | 4.9 (-14.1–23.9)§   |
| Hypertension     | 53  | 11.6 (-19.8–43.0)§                                                                    | 12.9 (-12.1–37.9)§  | 6.3 (-4.3–16.9)§    |
| No diabetes      | 99  | 9.5 (-39.1–58.1)‡                                                                     | 11.9 -25.3–49.1) §  | 5.7 (-10.3–21.7)§   |
| Diabetes         | 20  | 10.3 (-36.7–57.3)                                                                     | 9.4 (-27.6–46.4)*   | 4.9 (-10.1–19.9)†   |

Abbreviations: eGFR<sub>mdrd</sub>, eGFR<sub>epi</sub>, eGFR<sub>mix</sub> indicate estimated glomerular filtration rate from serum creatinine according to the Modification of Diet in Renal Disease or the Chronic Kidney Disease Epidemiology Collaboration equations, or from both serum cystatin C and creatinine. Differences were computed as eGFR<sub>mdrd</sub>, eGFR<sub>epi</sub>, or eGFR<sub>mix</sub> minus GFR estimated from serum cystatin C (eGFR<sub>cys</sub>). Values between brackets are the mean ± 2 SD intervals. N indicates the number of participants. Significance of the difference with eGFR<sub>cys</sub>: \* P≤0.05; † P≤0.01; ‡ P≤0.001; § P≤0.0001.

**Table S3.** Absolute bias between various estimates of GFR and the eGFR derived from serum cystatin C as referent method.

| Group            | N   | Absolute bias in estimates of glomerular filtration rate<br>(mL/min/1.73m <sup>2</sup> ) |                     |                     |
|------------------|-----|------------------------------------------------------------------------------------------|---------------------|---------------------|
|                  |     | eGFR <sub>mdrd</sub>                                                                     | eGFR <sub>epi</sub> | eGFR <sub>mix</sub> |
| All participants | 119 | 15.6 (2.9–53.0)                                                                          | 17.0 (1.1–46.0)     | 7.8 (0.9–18.6)      |
| Women            | 68  | 17.4 (2.9–55.4)                                                                          | 18.5 (2.6–46.7)     | 8.9 (1.3–20.5)      |
| Men              | 51  | 10.9 (2.8–44.9)                                                                          | 12.2 (0.4–33.4)     | 5.7 (0.7–14.0)      |
| <60 years        | 57  | 10.9 (0.4–64.7)                                                                          | 16.2 (1.0–53.7)     | 6.6 (1.0–24.5)      |
| ≥60 years        | 62  | 17.4 (3.8–44.9)                                                                          | 17.8 (1.3–33.4)     | 8.4 (0.9–15.8)      |
| Normotension     | 66  | 19.4 (2.9–58.9)                                                                          | 18.1 (1.2–48.0)     | 8.3 (1.0–20.5)      |
| Hypertension     | 53  | 12.3 (1.6–40.4)                                                                          | 15.6 (1.1–28.4)     | 6.7 (0.9–12.1)      |
| No diabetes      | 99  | 15.7 (1.6–55.4)                                                                          | 17.4 (1.2–46.0)     | 8.1 (1.0–19.1)      |
| Diabetes         | 20  | 14.1 (3.5–52.2)                                                                          | 14.6 (0.7–44.3)     | 7.2 (0.5–17.2)      |

Values are median and the 5<sup>th</sup> to 95<sup>th</sup> interval between brackets. N indicates the number of participants. Abbreviations: eGFR<sub>mdrd</sub>, eGFR<sub>epi</sub>, eGFR<sub>mix</sub> indicate estimated glomerular filtration rate from serum creatinine according to the Modification of Diet in Renal Disease or the Chronic Kidney Disease Epidemiology Collaboration equations, or from both serum cystatin C and creatinine. Absolute bias were computed as the absolute difference between eGFR<sub>mdrd</sub>, eGFR<sub>epi</sub>, or eGFR<sub>mix</sub> minus GFR estimated from serum cystatin C (eGFR<sub>cys</sub>).

**Table S4.** Estimated Glomerular Filtration Rate by Racial Parental Background of the Participants.

| Group                 | N   | glomerular filtration rate<br>(mL/min/1.73m <sup>2</sup> ) |                      |                     |                     |
|-----------------------|-----|------------------------------------------------------------|----------------------|---------------------|---------------------|
|                       |     | eGFR <sub>cys</sub>                                        | eGFR <sub>mdrd</sub> | eGFR <sub>epi</sub> | eGFR <sub>mix</sub> |
| All participants      | 119 | 80.0±23.8                                                  | 89.7±22.5            | 91.5±19.0           | 85.6±20.2           |
| Coincident white      | 82  | 78.1±25.7                                                  | 89.6±23.5            | 90.7±19.7           | 84.1±21.9           |
| White-Black           | 17  | 88.3±14.3                                                  | 99.7±23.4            | 100.2±14.5          | 94.6±14.2           |
| White-Native American | 16  | 77.3±14.4                                                  | 81.4±18.1            | 86.9±21.0           | 81.3±15.6           |
| Black-Native American | 4   | 82.1±7.1                                                   | 88.8±5.4             | 95.4±13.7           | 88.9±9.3            |

Values are mean ± SD. Abbreviations: eGFR<sub>mdrd</sub>, eGFR<sub>epi</sub>, eGFR<sub>cys</sub>, eGFR<sub>mix</sub> indicate estimated glomerular filtration rate from serum creatinine according to the Modification of Diet in Renal Disease or the Chronic Kidney Disease Epidemiology Collaboration equations, or from both serum cystatin C and creatinine.
